# Supplementary material for: Promising application of a SiC2/C3B heterostructure as a new platform for lithium-ion batteries
Source: Royal Society of Chemistry journal article supplement (doi:10.1039/d1cp05298e), 2022-01-01
Supplement: d1cp05298e1.pdf [file d1cp05298e1.pdf]

## Supplementary Information

### Promising application of SiC<sub>2</sub>/C<sub>3</sub>B heterostructure as a new platform for lithium-ion batteries

Minrui Yang, Lei Chen, Fan Kong, Jiyuan Guo\*, Huabing Shu, Jun Dai

*School of Science, Jiangsu University of Science and Technology, Zhenjiang, 212100, China*

*\*E-mail: jyguo@just.edu.cn*

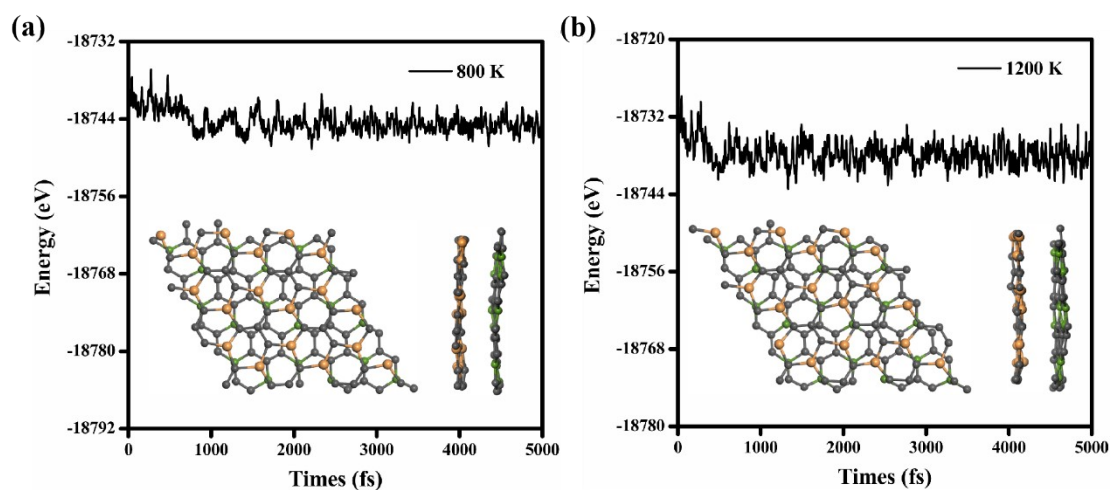

**Fig. S1** Total energy fluctuation and structure of the SiC<sub>2</sub>/C<sub>3</sub>B heterostructure during the AIMD simulations at (a) 800 K and (b) 1200 K after 5 ps.

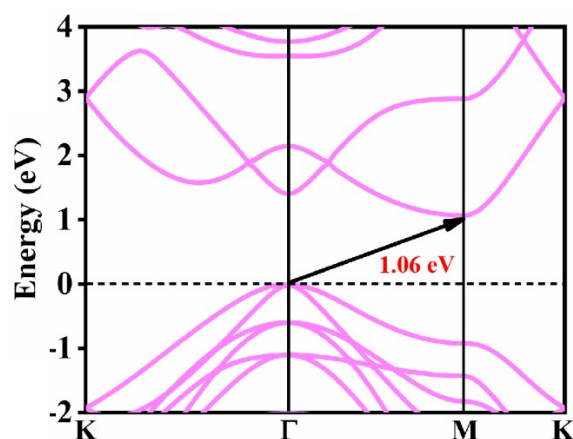

**Fig. S2** Quasi-particle band structure of the SiC<sub>2</sub>/C<sub>3</sub>B heterostructure.

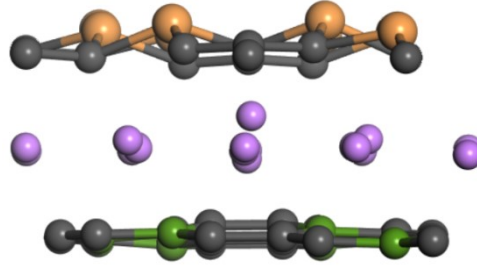

**Fig. S3** Side views of lithiated SiC<sub>2</sub>/C<sub>3</sub>B heterostructure with 17 Li atoms.

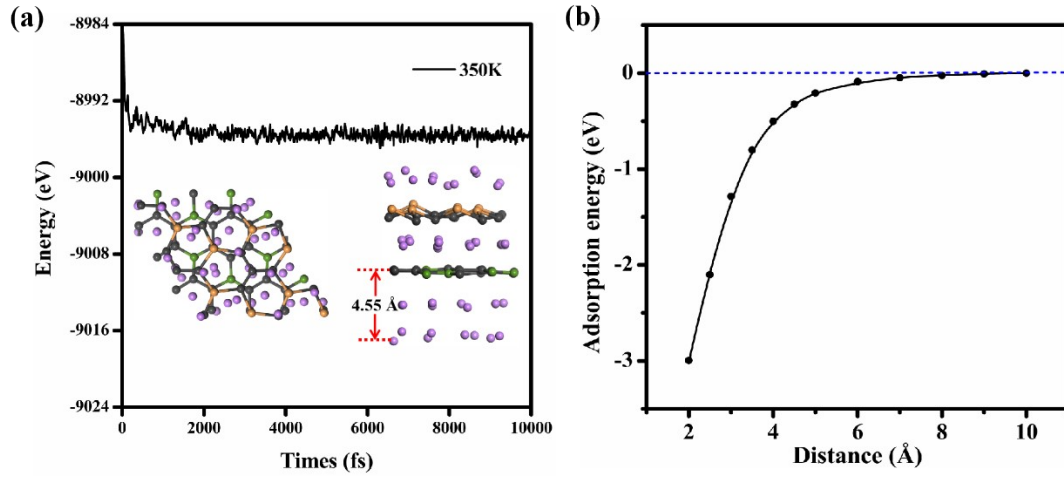

**Fig. S4** (a) Total energy fluctuation and structure of Li<sub>44</sub>C<sub>40</sub>B<sub>8</sub>Si<sub>8</sub> during the AIMD simulations at 350 K after 10 ps. (b) The adsorption energy changing along with the distance between Li atom and the outside surface of C<sub>3</sub>B layer.

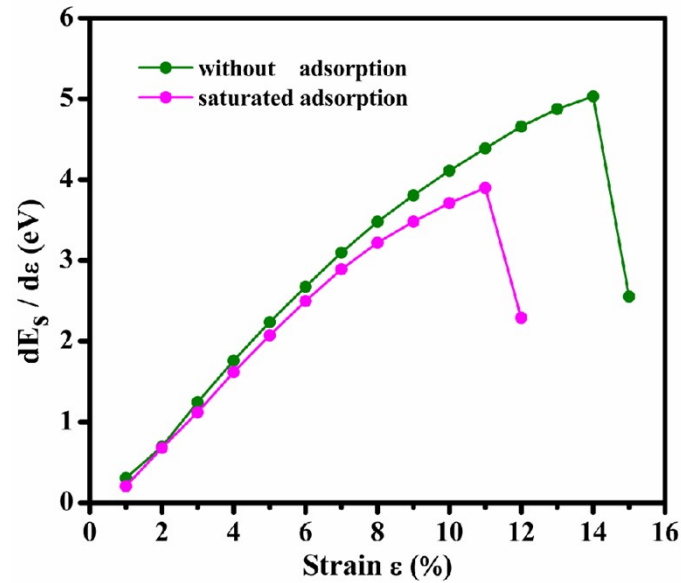

**Fig. S5** The variation in the derivative of strain energy ( $E_s$ ) of the SiC<sub>2</sub>/C<sub>3</sub>B heterostructure without adsorption (green solid line) and with saturated adsorption (pink solid line).
